# Supplementary material for: Screening of Acrylamide Content in Commercial Plant-Based Protein Ingredients from Different Technologies
Source: MDPI journal article supplement (doi:10.3390/foods12061331), 2023-03-21
Supplement: s1 [file s1]

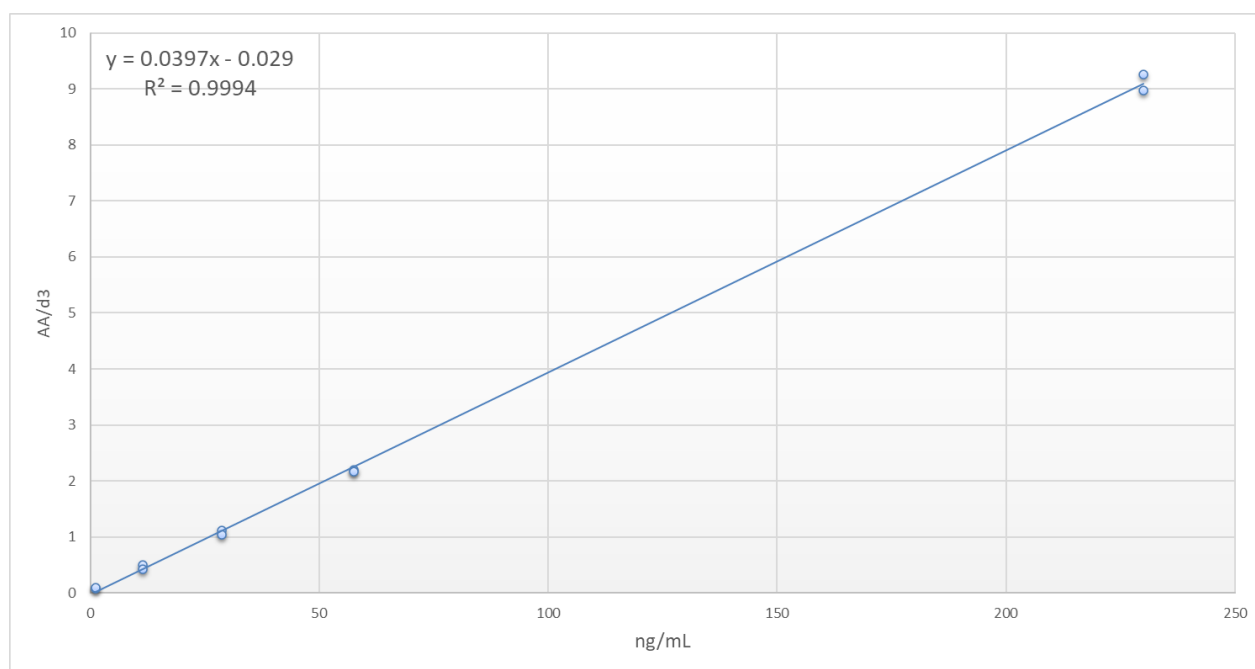

Figure S1. LC-MS calibration curve developed for the quantitation of acrylamide. Each standard solution has been analysed in duplicate.
